# Supplementary material for: Epiphycan Predicts Poor Outcomes and Promotes Metastasis in Ovarian Cancer
Source: PubMed Central journal article supplement (PMC8650094; doi:10.3389/fonc.2021.653782), 2021-11-23

Supplementary Figure 1. Gene lists were sorted by correlation and ranked Gene Set Enrichment Analysis (GSEA) was performed. A. GSEA enrichment analysis shows that EPYC-related genes positively activate the EMT pathway; B. GSEA enrichment analysis shows that EPYC-related genes are significantly enriched in the PI3K/AKT signaling pathway and positively activate the pathway; C. GSEA enrichment Set analysis showed that EPYC-related genes were significantly enriched in the TGF- $\beta$  signaling pathway and positively activated the pathway.

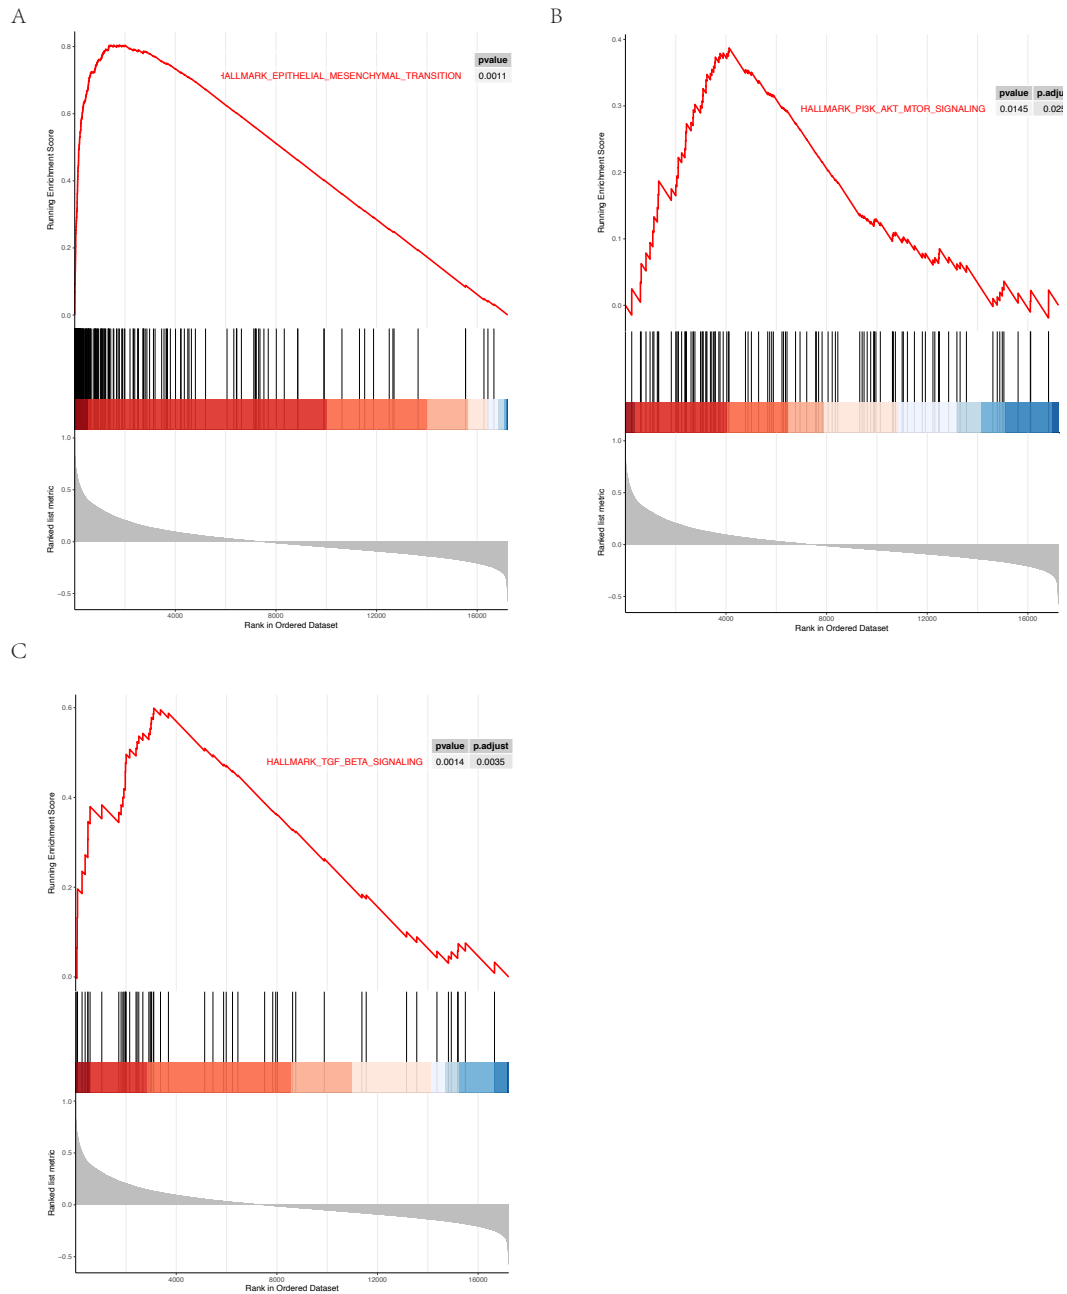

Supplementary Figure 2. EPYC has a strong correlation with TGF $\beta$  signaling pathway molecules and SNAI2 expression. A. The Pearson correlation coefficient between EPYC and TGFBI is 0.389,  $p < 0.001$ ; B. The Pearson correlation coefficient between EPYC and TGFBI is 0.506,  $p < 0.001$ ; C. The Pearson correlation coefficient between EPYC and TGFBI3 is 0.445,  $p < 0.001$ ; D. Pearson correlation coefficient between EPYC and TGFBR1 is 0.332,  $p < 0.001$ ; E. Pearson correlation coefficient between EPYC and TGFBR2 is 0.391,  $p < 0.001$ ; F. Pearson correlation coefficient between EPYC and TGFBR3 is -0.214,  $p < 0.001$ ; G. The Pearson correlation coefficient between EPYC and SNAI2 is 0.607,  $p < 0.001$ .

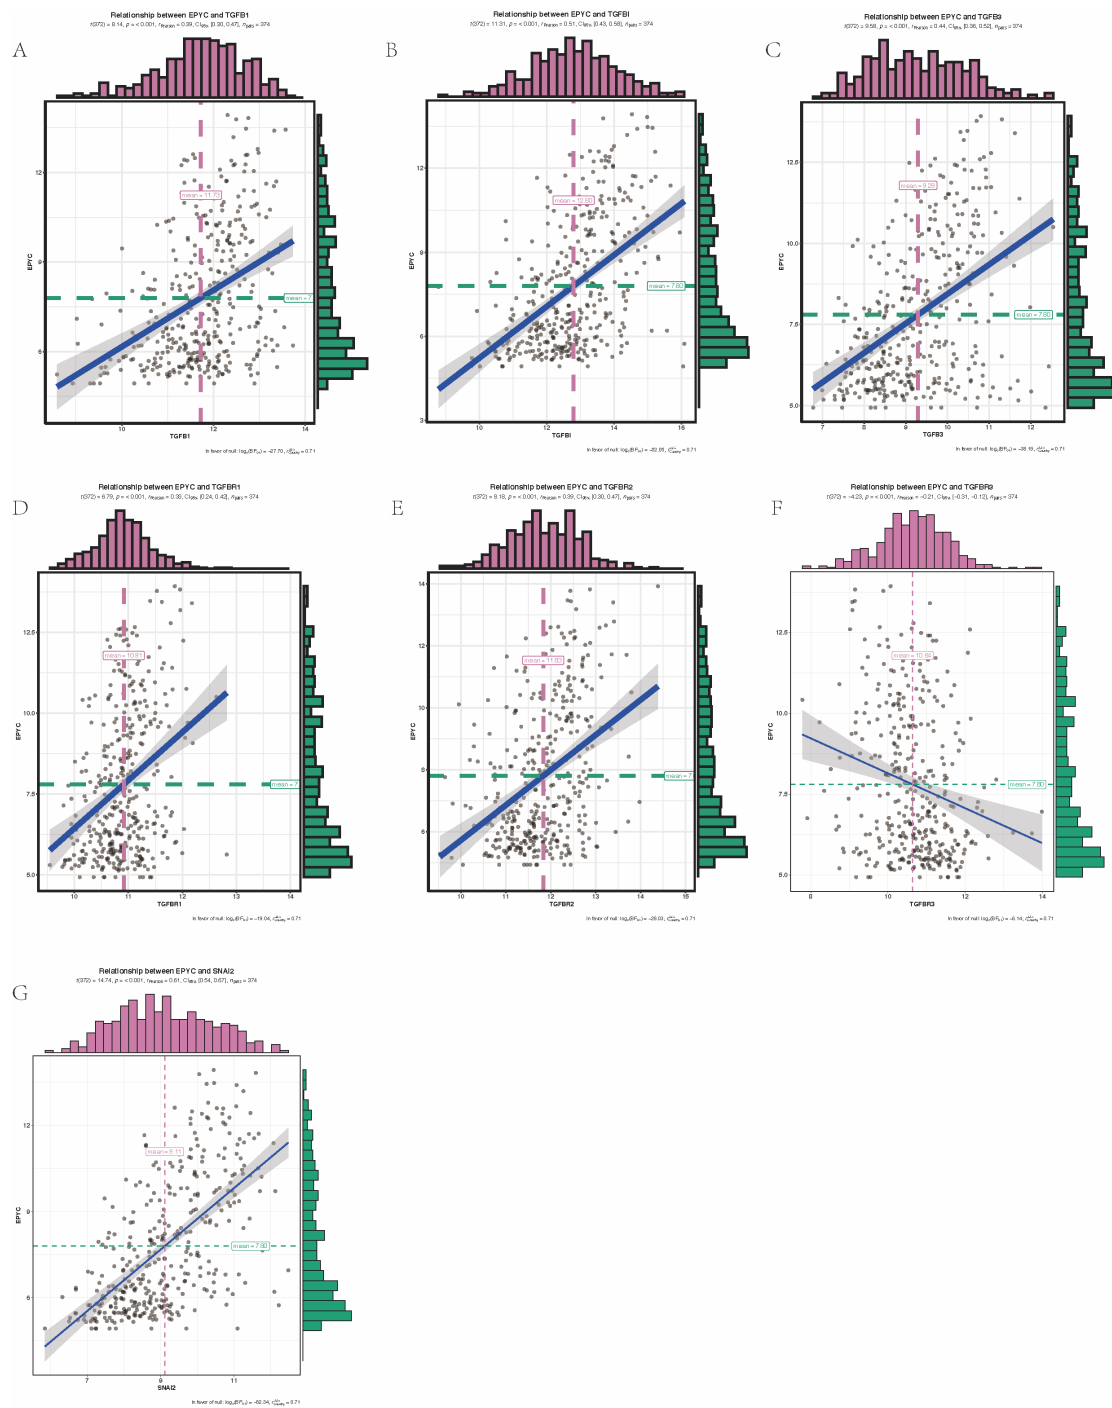

Supplement: DataSheet_1.pdf [file DataSheet_1.pdf]
